# Supplementary material for: The phenotypic spectrum of germline YARS2 variants: from isolated sideroblastic anemia to mitochondrial myopathy, lactic acidosis and sideroblastic anemia 2
Source: PubMed Central journal article supplement — Haematologica. 2018 Jul 19;103(12):2008–15. doi: 10.3324/haematol.2017.182659 (PMC6269294; doi:10.3324/haematol.2017.182659), 2018-12
Supplement: 2017_182659-Disclosures_and_Contributions.pdf [file 2017_182659-Disclosures_and_Contributions.pdf]

Haematologica  
HAEMATOL/2017/182659  
Version 3

The phenotypic spectrum of germline YARS2 variants: from isolated sideroblastic anemia to mitochondrial myopathy, lactic acidosis and sideroblastic anemia 2

Lisa G Riley, Matthew M Heeney, Joëlle Rudinger-Thirion, Magali Frugier, Dean R Campagna, Ronghao Zhou, Gregory A Hale, Lee M Hilliard, Joel A Kaplan, Janet L Kwiatkowski, Colin A Sieff, David P Steensma, Alexander J Rennings, Annet Simons, Nicolaas Schaap, Richard J Roodenburg, Tjitske Kleefstra, Leonor Arenillas, Josep Fita-Torró, Rasha Ahmed, Miguel Abboud, Elie Bechara, Roula Farah, Rienk YJ Tamminga, Sylvia S Bottomley, Mayka Sanchez, Dorine W Swinkels, John Christodoulou, and Mark D Fleming

Disclosures: This research was supported by Australian NHMRC grant 1026891 to JC, NIH DK087992 to M.D.F., and grants SAF2015-70412-R from the Spanish Secretary of Research, Development and Innovation (MINECO), DJCLS R14/04 from Deutsche José Carreras Leukämie Stiftung, 2014 SGR225 (GRE) from Generalitat de Catalunya and economical support from Fundació Internacional Josep Carreras and from Obra Social “la Caixa” Spain to M.S.

Contributions: G.A.H., L.M.H., J.A.K., J.L.K., C.A.S., D.P.S. R.A., E.B., M.A., R.F., S.S.B, L.A. and R.T. ascertained and phenotyped patients. M.M.H. and R.Z. collated and analyzed the clinical data. M.M.H and M.D.F. recruited and phenotyped families 1-3, and 5-9, which were genotyped by D.R.C. L.G.R performed in silico analysis of variants, cloning of missense variants and wrote the initial draft of the manuscript. J.R.T. and M.F. performed amino-acylation assays and protein modeling. J.F. and M.S. performed genotyping and/or data analysis for patient 10. A.R., A.S., N.S., R.J.R., T.K. and D.W.S. ascertained, phenotyped, and genotyped patient 4. M.D.F and J.C coordinated all aspects of the work and wrote the final manuscript. All authors contributed to the preparation of the manuscript.
